# Supplementary material for: Conditions for multicompartment polymeric tadpoles via temperature directed self-assembly
Source: Royal Society of Chemistry journal article supplement (doi:10.1039/c7py01024a), 2017-01-01
Supplement: c7py01024a1.pdf [file c7py01024a1.pdf]

# *Supporting Information*

to

## Conditions for Multicompartment Polymeric Tadpoles via Temperature Directed Self-Assembly

*Valentin A. Bobrin, Zhongfan Jia, and Michael J. Monteiro\**

1. Australian Institute for Bioengineering and Nanotechnology, The University of  
Queensland, Brisbane QLD 4072, Australia

\*author to whom correspondence should be sent:

e-mail: [m.monteiro@uq.edu.au](mailto:m.monteiro@uq.edu.au)

## Synthetic Procedures

### Synthesis of methyl 2-(butylthiocarbonothioylthio) propanoate trithiocarbonate chain transfer (RAFT) agent (MCEBTTC)

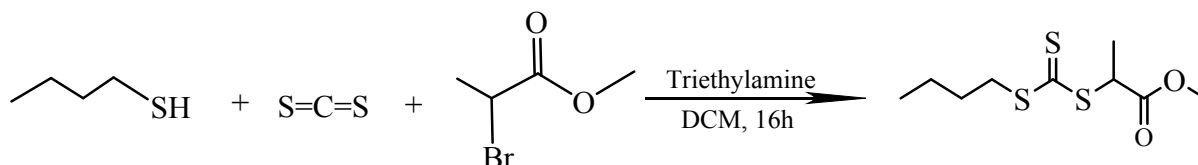

Carbon disulfide (6.18 ml, 0.103 mol) was dissolved in 50 mL of dichloromethane, and added dropwise to a stirred solution of 1-butanethiol (10 ml, 0.093 mol) and triethylamine (14.3 mL, 0.103 mol) in dichloromethane (100 mL) under argon over a 30 min period at 0 °C. The solution gradually turned yellow upon addition. The solution was then stirred at 25 °C for 1 h. Methyl bromopropionate (11.46 mL, 0.103 mol) in dichloromethane (50 mL) was then added dropwise to this solution over a 30 min period and the solution was further stirred for 2 h. The dichloromethane solvent was removed by blowing with a nitrogen flow and the residue dissolved in diethyl ether. The solution was then washed with cold 10 % HCl solution (3 x 50 mL) and MilliQ water (3 x 50 mL) and then dried over anhydrous  $\text{MgSO}_4$ . The ether was then removed under a vacuum using rotary evaporation and the residual yellow oil was purified using column chromatography (19:1 petroleum ether/ethyl acetate on silica,  $R_f$  = 0.56). Yield is 78 %.  $^1\text{H}$  NMR ( $\text{CDCl}_3$ , 298K, 300 MHz)  $\delta$ (ppm): 4.84 (q,  $J$  = 7.37 Hz, 1H, -C(=S)S-CH(-COOCH<sub>3</sub>)-CH<sub>3</sub>), 3.73 (s, 3H, -CH(-CH<sub>3</sub>)-COOCH<sub>3</sub>), 3.36 (t,  $J$  = 7.39 Hz, 2H, CH<sub>3</sub>CH<sub>2</sub>CH<sub>2</sub>CH<sub>2</sub>S-), 1.65 (m, 2H, CH<sub>3</sub>CH<sub>2</sub>CH<sub>2</sub>CH<sub>2</sub>S-), 1.62 (d,  $J$  = 7.32 Hz, 3H, -C(=S)S-CH(-COOCH<sub>3</sub>)-CH<sub>3</sub>), 1.43 (m, 2H, CH<sub>3</sub>CH<sub>2</sub>CH<sub>2</sub>CH<sub>2</sub>S-), 0.92 (t,  $J$  = 7.32 Hz, 3H, CH<sub>3</sub>CH<sub>2</sub>CH<sub>2</sub>CH<sub>2</sub>S-);  $^{13}\text{C}$  NMR ( $\text{CDCl}_3$ , 298K, 75 MHz)  $\delta$ (ppm): 171.63, 52.82, 47.68, 36.94, 29.89, 22.02, 16.91, 13.55.

### Synthesis of MacroCTA-A

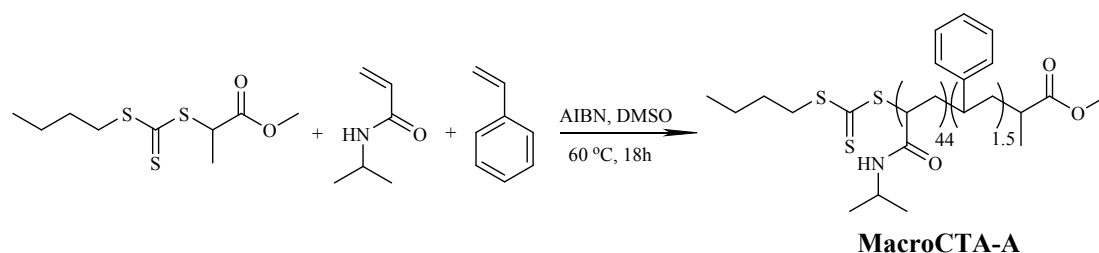

MacroCTA-A was synthesized by the following method. The concentration ratio of NIPAM/STY/RAFT (MCEBTTC)/AIBN was 44/1.1/1/0.1, and the ratio of DMSO to

NIPAM was 2/1 (v/w). NIPAM (3 g,  $2.65 \times 10^{-2}$  mol), styrene (0.069 g,  $6.6 \times 10^{-4}$  mol), MCEBTTC (0.1521 g,  $6.03 \times 10^{-4}$  mol) and AIBN (9.9 mg,  $6.03 \times 10^{-5}$  mol) were dissolved in DMSO (6 mL). The mixture was deoxygenated by purging with Argon for 40 min then heated at 60 °C and polymerized for 18 h. The reaction was stopped by cooling to 0 °C in an ice bath and exposed to air. Conversions of monomers were calculated using  $^1\text{H}$  NMR. The solution was then diluted with chloroform (200 mL) and washed five times with 40 mL of Milli-Q water. Note, if this is not done, the emulsion polymerizations using this and all other MacroCTAs in the next stage will not work effectively. The chloroform was then dried over anhydrous  $\text{MgSO}_4$ , filtered and reduced in volume by rotary evaporation. The polymer was recovered by precipitation into large excess of diethyl ether (400 mL), isolated by filtration, and then dried under vacuum for 24 h at room temperature to get a yellow powder product (yield is 78 %). SEC and  $^1\text{H}$  NMR analyses were used to calculate molecular weight and repeating units of purified polymer.

### Synthesis of MacroCTA-B

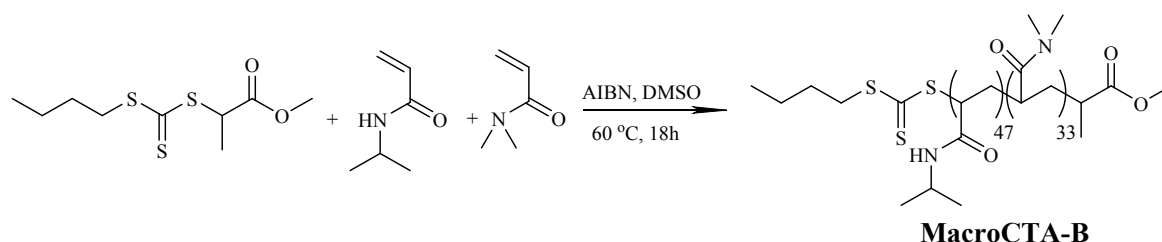

MacroCTA-B was synthesized as follows. A concentration ratio of NIPAM/DMA/RAFT (MCEBTTC)/AIBN was 44/30/1/0.1, and the ratio of DMSO to NIPAM and DMA was 1.8/1 (v/w). NIPAM (3 g,  $2.65 \times 10^{-2}$  mol), DMA (1.792 g,  $1.81 \times 10^{-2}$  mol), MCEBTTC (0.1521 g,  $6.03 \times 10^{-4}$  mol) and AIBN (9.9 mg,  $6.03 \times 10^{-5}$  mol) were dissolved in DMSO (9 mL). The mixture was deoxygenated by purging with Argon for 40 min then heated at 60 °C and polymerized for 16 h. The reaction was stopped by cooling to 0 °C in an ice bath and exposed to air. Conversions of monomers were calculated using  $^1\text{H}$  NMR. The solution was then diluted with chloroform (200 mL) and washed with Milli-Q water (5x40 mL). The chloroform was then dried over anhydrous  $\text{MgSO}_4$ , filtered and reduced in volume by rotary evaporation. The polymer was recovered by precipitation into large excess of diethyl ether (400 mL), isolated by filtration, and then dried under vacuum for 24 h at room temperature to get a yellow powder product (yield is 80 %). SEC and  $^1\text{H}$  NMR analyses were used to calculate molecular weight and repeating units of purified polymer.

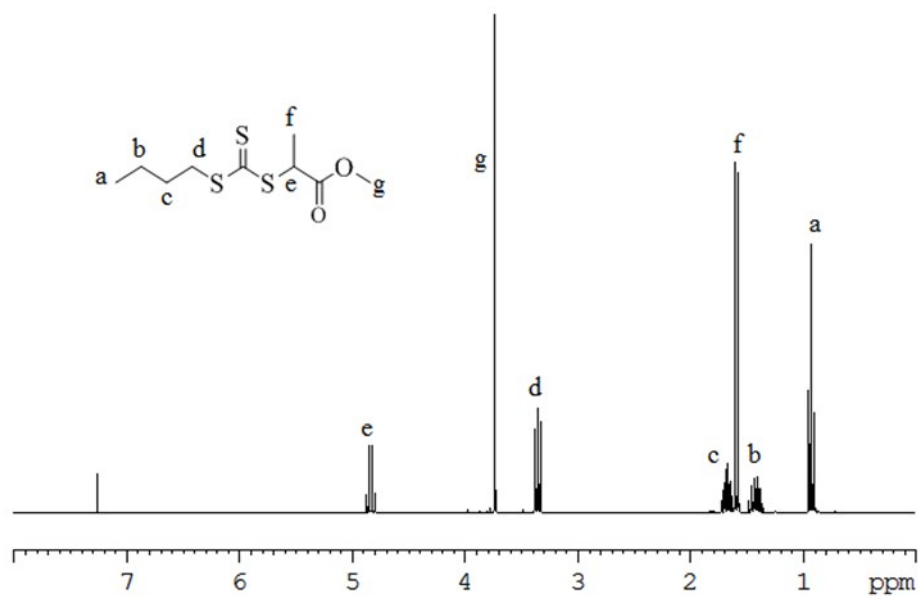

**Figure S1.** <sup>1</sup>H NMR spectrum of MCEBTTC in CDCl<sub>3</sub>

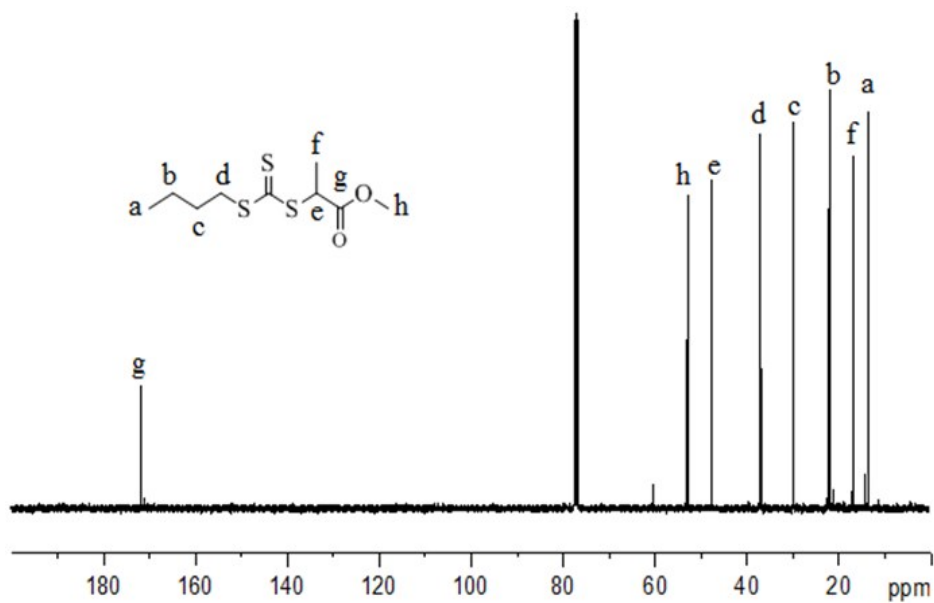

**Figure S2.** <sup>13</sup>C NMR spectrum of MCEBTTC in CDCl<sub>3</sub>

| MacroCTA                                                                                    | Conversion <sup>a</sup> |            |            |              | $M_n$<br>(theory) <sup>b</sup> | $M_n$<br>( <sup>1</sup> H NMR) <sup>c</sup> | Repeating units ( <sup>1</sup> H<br>NMR) <sup>c</sup> |     |     | SEC Triple<br>detection<br>(DMAc) <sup>d</sup> |           | SEC RI (DMAc) |           | LCST (°C) <sup>e</sup> |
|---------------------------------------------------------------------------------------------|-------------------------|------------|------------|--------------|--------------------------------|---------------------------------------------|-------------------------------------------------------|-----|-----|------------------------------------------------|-----------|---------------|-----------|------------------------|
|                                                                                             | NIPAM<br>(%)            | DMA<br>(%) | STY<br>(%) | Total<br>(%) |                                |                                             | NIPAM                                                 | DMA | STY | $M_n$                                          | $\bar{D}$ | $M_n$         | $\bar{D}$ |                        |
| (A) P(NIPAM <sub>44</sub> -co-STY <sub>1.5</sub> )-<br>S(C=S)SC <sub>4</sub> H <sub>9</sub> | 98                      | -          | 100        | 98.1         | 5330                           | 5410                                        | 44                                                    | -   | 1.5 | 5180                                           | 1.04      | 10350         | 1.19      | 19                     |
| (B) P(NIPAM <sub>47</sub> -co-DMA <sub>33</sub> )-<br>S(C=S)SC <sub>4</sub> H <sub>9</sub>  | 98                      | 100        | -          | 98.8         | 8100                           | 8830                                        | 47                                                    | 33  | -   | 8120                                           | 1.05      | 14070         | 1.19      | 63                     |

**Table S1.** Synthesis of functional MacroCTAs by RAFT polymerization at 60 °C in DMSO using AIBN as an initiator

<sup>a</sup>Calculated based on <sup>1</sup>H NMR by comparing integrations of polymers and residual monomers. Total conversion of polymer (Total) was calculated: for example for polymer (A), total conv. =  $[(\text{conv.}_{\text{NIPAM}} \cdot 44) + (\text{conv.}_{\text{STY}} \cdot 1.1)] / (44 + 1.1) \cdot 100$ ; <sup>b</sup> $M_n$  (theory) =  $([\text{NIPAM}]/[\text{RAFT}]) \times \text{conv.}_{\text{NIPAM}} \times 113.16 + ([\text{STY}]/[\text{RAFT}]) \times \text{conv.}_{\text{STY}} \times 104.15 + M_{\text{RAFT}}$ ;  $([\text{NIPAM}]/[\text{RAFT}]) \times \text{conv.}_{\text{NIPAM}} \times 113.16 + ([\text{DMA}]/[\text{RAFT}]) \times \text{conv.}_{\text{DMA}} \times 99.13 + M_{\text{RAFT}}$ . <sup>c</sup>Molecular weights ( $M_n$  (NMR)) and number of repeating units were calculated from <sup>1</sup>H NMR. <sup>d</sup>DMAc + 0.03 wt. % LiCl as eluent with polystyrene as calibration standard. <sup>e</sup>LCST is defined as the minimum temperature where all phases are soluble. LCST was measured in the presence of surfactant SDS (53.8 mg/mL polymer, 2.23 mg/mL SDS).



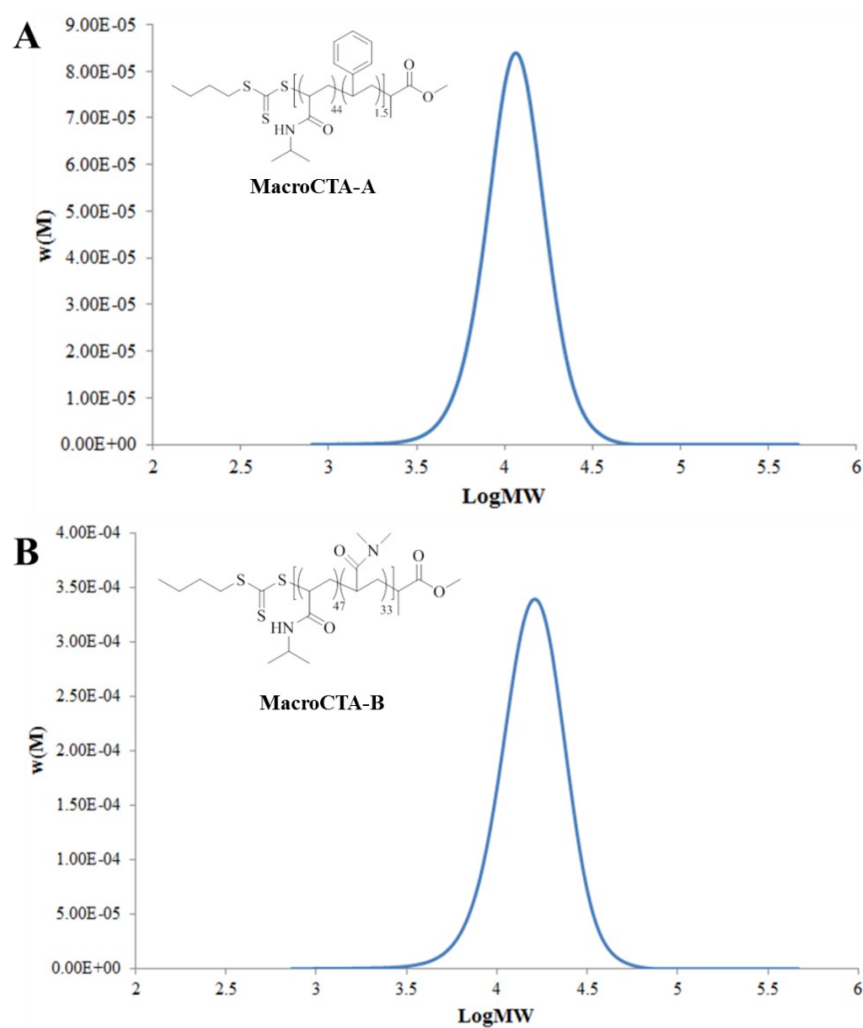

**Figure S3.** SEC traces (RI detector) of MacroCTAs: (A) MacroCTA-A, (B) MacroCTA-B. DMAc + 0.03 wt. % LiCl as eluent with polystyrene as calibration standard.

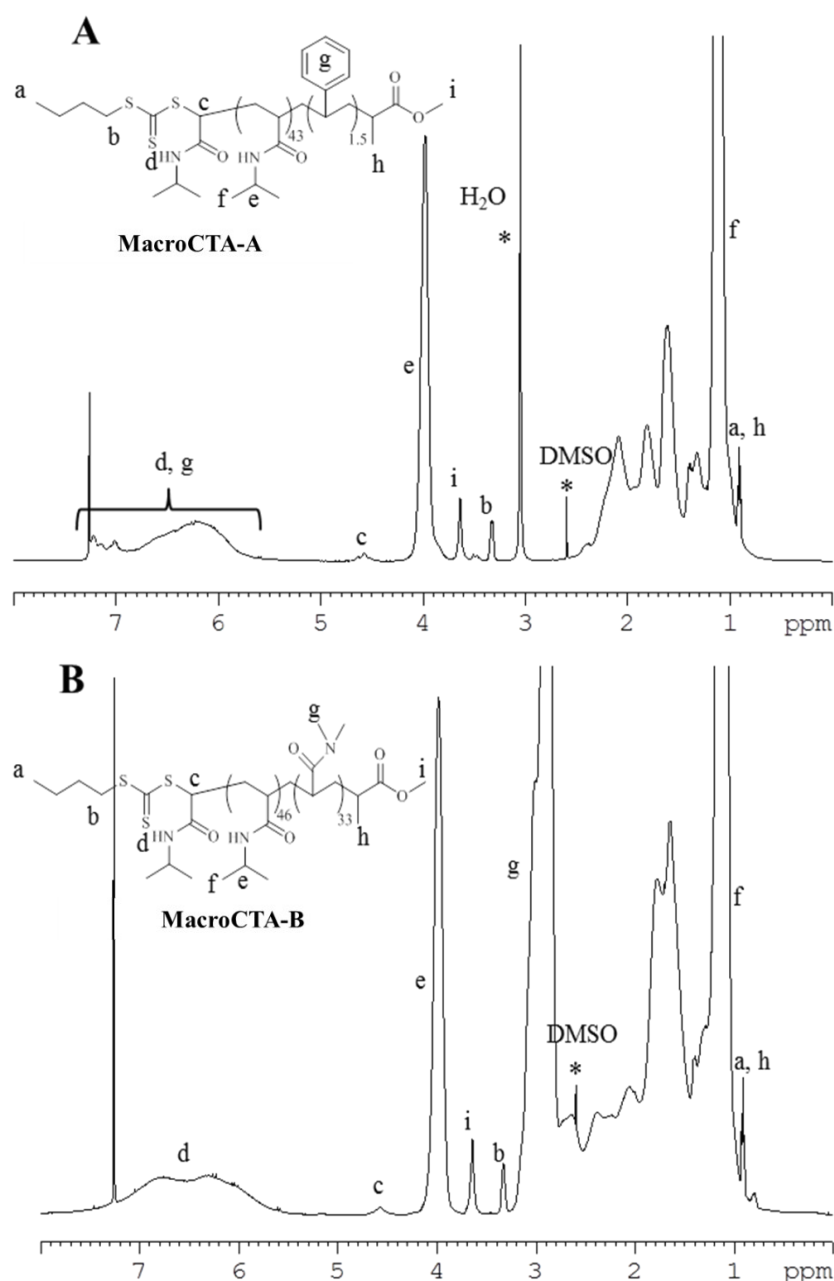

**Figure S4.**  $^1\text{H}$  NMR ( $\text{CDCl}_3$ , 298 K, 500 MHz) spectra of MacroCTAs: (A) MacroCTA-A, (B) MacroCTA-B. Repeating units of NIPAM were calculated by the integration of two

peaks at 3.65 ppm and 4 ppm and using the following equation:  $N_{\text{NIPAM}} = \frac{3 \times I_{4.0}}{I_{3.6}}$ . Repeating units DMA were calculated by the integration of two peaks at 2.8 ppm and 3.65 ppm and

using the following equation:  $N_{\text{DMA}} = \frac{3 \times I_{2.8}}{6 \times I_{3.6}}$ . Repeating units of STY were calculated by the integration of two peaks at 3.6 ppm and 6-7 ppm (broad peak) using the following equation:



$$N_{\text{STY}} = \frac{3 \times (I_{6-7} - N_{\text{NIPAM}})}{5 \times I_{3.6}}$$
 , notice that  $N_{\text{NIPAM}}$  was subtracted from  $I_{6-7}$  to consider the contribution from  $-\text{NH}-$  groups of NIPAM units.

**Table S2.** Number-average sizes ( $D_h$ ) and  $\bar{D}$ s of particles produced from slow heating (0.6 °C/min) of the mixture (0.5:0.5 wt.) of MacroCTA-A and MacroCTA-B.

| Temperature<br>(° C) | Mixture (0.5:0.5 wt.) |           |
|----------------------|-----------------------|-----------|
|                      | $D_h$ (nm)            | $\bar{D}$ |
| 3                    | 3                     | 0.436     |
| 10                   | 3                     | 0.560     |
| 15                   | 2                     | 0.480     |
| 17                   | 2                     | 0.863     |
| 19                   | 8                     | 0.975     |
| 21                   | 10                    | 0.931     |
| 23                   | 24                    | 0.276     |
| 25                   | 111                   | 0.191     |
| 27                   | 74                    | 0.310     |
| 29                   | 101                   | 0.382     |
| 35                   | 86                    | 0.797     |
| 39                   | 74                    | 0.752     |
| 42                   | 69                    | 0.962     |
| 45                   | 69                    | 0.988     |
| 50                   | 65                    | 0.623     |
| 55                   | 67                    | 0.923     |
| 60                   | 76                    | 0.615     |
| 63                   | 160                   | 0.183     |
| 67                   | 183                   | 0.250     |
| 70                   | 187                   | 0.157     |

**Table S3.** Kinetics of the RAFT-mediated emulsion polymerization of STY at 70 °C and 10 wt. % polymer fraction using the mixture (0.5:0.5 wt.) of MacroCTA-A and MacroCTA-B as MacroCTAs, AIBN as an initiator and SDS as a surfactant. **Method I – fast heating.**

| Repeat | Time,<br>min | Conversion,<br>% <sup>a</sup> | $M_n$<br>(theory) <sup>b</sup> | STY<br>units<br>(NMR) <sup>c</sup> | $M_n$<br>(NMR) <sup>c</sup> | SEC (THF) <sup>d</sup> |           | DLS <sup>e</sup> |           |
|--------|--------------|-------------------------------|--------------------------------|------------------------------------|-----------------------------|------------------------|-----------|------------------|-----------|
|        |              |                               |                                |                                    |                             | $M_n$                  | $\bar{D}$ | $D_h$            | $\bar{D}$ |
| i      | 15           | 2                             | 6627                           | 1                                  | 6614                        | 4711                   | 1.08      | 136              | 0.075     |
|        | 45           | 3                             | 6685                           | 3                                  | 6822                        | 5179                   | 1.09      | 115              | 0.112     |
|        | 90           | 39                            | 8785                           | 22                                 | 8801                        | 7783                   | 1.16      | 100              | 0.144     |
|        | 130          | 63                            | 10184                          | 36                                 | 10259                       | 9556                   | 1.2       | 114              | 0.123     |
|        | 170          | 71                            | 10651                          | 40                                 | 10676                       | 9960                   | 1.2       | 110              | 0.135     |
|        | 210          | 74                            | 10826                          | 43                                 | 10988                       | 10032                  | 1.2       | 119              | 0.121     |
|        | 240          | 74                            | 10826                          | 43                                 | 10988                       | 10045                  | 1.2       | 110              | 0.119     |
| ii     | 15           | 2                             | 6627                           | 1                                  | 6614                        | 4716                   | 1.08      | 140              | 0.079     |
|        | 45           | 7                             | 6918                           | 4                                  | 6926                        | 5450                   | 1.09      | 88               | 0.187     |
|        | 90           | 43                            | 9018                           | 24                                 | 8905                        | 8479                   | 1.16      | 91               | 0.14      |
|        | 130          | 65                            | 10301                          | 37                                 | 10363                       | 9690                   | 1.17      | 95               | 0.114     |
|        | 170          | 71                            | 10651                          | 40                                 | 10676                       | 9897                   | 1.17      | 89               | 0.14      |
|        | 210          | 75                            | 10884                          | 43                                 | 10988                       | 10044                  | 1.18      | 88               | 0.169     |
|        | 240          | 75                            | 10884                          | 43                                 | 10988                       | 10106                  | 1.17      | 96               | 0.135     |
| iii    | 15           | 3                             | 6685                           | 2                                  | 6718                        | 4738                   | 1.08      | 149              | 0.09      |
|        | 45           | 5                             | 6802                           | 2                                  | 6718                        | 5191                   | 1.09      | 111              | 0.165     |
|        | 90           | 40                            | 8843                           | 24                                 | 9010                        | 7654                   | 1.14      | 90               | 0.177     |
|        | 130          | 63                            | 10184                          | 36                                 | 10259                       | 9054                   | 1.17      | 90               | 0.114     |
|        | 170          | 71                            | 10651                          | 41                                 | 10780                       | 9678                   | 1.17      | 93               | 0.135     |
|        | 210          | 76                            | 10943                          | 44                                 | 11092                       | 9993                   | 1.17      | 92               | 0.135     |
|        | 240          | 76                            | 10943                          | 44                                 | 11092                       | 10098                  | 1.18      | 85               | 0.156     |

<sup>a</sup>Conversions were obtained by gravimetric method. <sup>b</sup>Theoretical molecular weights were calculated based on the monomer conversions and using Equation S1 below. <sup>c</sup>Molecular weights ( $M_n$ (NMR)) were obtained from <sup>1</sup>H NMR. <sup>d</sup>THF as eluent with polystyrene as calibration standard. <sup>e</sup>Particle size ( $D_h$ ) and the polydispersity index ( $\bar{D}$ ) of latex were measured by DLS at 70 °C.

$$M_n(\text{theory}) = \sum_i x_i (M_{n, \text{MacroCTA}(i)}) + \frac{n_{\text{STY}} \times M_{w, \text{STY}} \times \text{Conv.}}{\sum_j n_{\text{MacroCTA}(j)}} \quad (\text{Equation S1})$$

where  $x_i$  is the mole fraction of MacroCTA(i);  $M_{n, \text{MacroCTA}(i)}$  is the number-average molecular weight of MacroCTA(i); Conv. is the fraction conversion of styrene in the second block polymerization;  $n_{\text{STY}}$  and  $n_{\text{MacroCTA}(i)}$  are the initial moles of styrene and MacroCTA, respectively; and  $M_{w, \text{STY}}$  is the molecular weight of styrene (i.e. 104.15).

**Table S4.** Kinetics of the RAFT-mediated emulsion polymerization of STY at 70 °C and 10 wt. % polymer fraction using the mixture (0.5:0.5 wt.) of MacroCTA-A and MacroCTA-B as MacroCTAs, AIBN as an initiator and SDS as a surfactant. **Method I – slow heating.**

| Repeat | Time, min | Conversion, % <sup>a</sup> | $M_n$ (theory) <sup>b</sup> | STY units (NMR) <sup>c</sup> | $M_n$ (NMR) <sup>c</sup> | SEC (THF) <sup>d</sup> |           | DLS <sup>e</sup> |           |
|--------|-----------|----------------------------|-----------------------------|------------------------------|--------------------------|------------------------|-----------|------------------|-----------|
|        |           |                            |                             |                              |                          | $M_n$                  | $\bar{D}$ | $D_h$            | $\bar{D}$ |
| i      | 15        | 3                          | 6685                        | 2                            | 6718                     | 4910                   | 1.08      | 113              | 0.164     |
|        | 45        | 17                         | 7501                        | 9                            | 7447                     | 5781                   | 1.09      | 138              | 0.163     |
|        | 90        | 58                         | 9893                        | 32                           | 9843                     | 9000                   | 1.27      | 133              | 0.19      |
|        | 130       | 76                         | 10943                       | 43                           | 10988                    | 10211                  | 1.26      | 122              | 0.202     |
|        | 170       | 76                         | 10943                       | 44                           | 11093                    | 10260                  | 1.27      | 138              | 0.202     |
|        | 210       | 76                         | 10943                       | 44                           | 11093                    | 10481                  | 1.25      | 133              | 0.2       |
|        | 240       | 76                         | 10943                       | 44                           | 11093                    | 10610                  | 1.26      | 130              | 0.185     |
| ii     | 15        | 3                          | 6685                        | 2                            | 6718                     | 4891                   | 1.09      | 100              | 0.146     |
|        | 45        | 17                         | 7501                        | 10                           | 7551                     | 5846                   | 1.09      | 127              | 0.215     |
|        | 90        | 57                         | 9834                        | 31                           | 9738                     | 8691                   | 1.21      | 102              | 0.226     |
|        | 130       | 70                         | 10593                       | 41                           | 10780                    | 9941                   | 1.21      | 97               | 0.174     |
|        | 170       | 80                         | 11176                       | 45                           | 11197                    | 10198                  | 1.21      | 110              | 0.162     |
|        | 210       | 82                         | 11292                       | 46                           | 11301                    | 10234                  | 1.21      | 99               | 0.174     |
|        | 240       | 82                         | 11292                       | 46                           | 11301                    | 10331                  | 1.21      | 136              | 0.175     |
| iii    | 15        | 3                          | 6685                        | 2                            | 6718                     | 4892                   | 1.08      | 98               | 0.128     |
|        | 45        | 14                         | 7326                        | 9                            | 7447                     | 5797                   | 1.1       | 118              | 0.209     |
|        | 90        | 59                         | 9951                        | 33                           | 9947                     | 8725                   | 1.2       | 106              | 0.21      |
|        | 130       | 72                         | 10709                       | 41                           | 10780                    | 9918                   | 1.21      | 86               | 0.208     |
|        | 170       | 81                         | 11234                       | 47                           | 11405                    | 10242                  | 1.21      | 95               | 0.24      |
|        | 210       | 81                         | 11234                       | 47                           | 11405                    | 10319                  | 1.21      | 101              | 0.156     |
|        | 240       | 81                         | 11234                       | 47                           | 11405                    | 10413                  | 1.2       | 127              | 0.213     |

<sup>a</sup>Conversions were obtained by gravimetric method. <sup>b</sup>Theoretical molecular weights were calculated based on the monomer conversions and using Equation S1 below. <sup>c</sup>Molecular weights ( $M_n$  (NMR)) were obtained from <sup>1</sup>H NMR. <sup>d</sup>THF as eluent with polystyrene as calibration standard. <sup>e</sup>Particle size ( $D_h$ ) and the polydispersity index ( $\bar{D}$ ) of latex were measured by DLS at 70 °C.

$$M_n(\text{theory}) = \sum_i x_i (M_{n, \text{MacroCTA}(i)} + \frac{n_{\text{STY}} \times M_{w, \text{STY}} \times \text{Conv.}}{\sum_j n_{\text{MacroCTA}(j)}})$$

(Equation S1)

where  $x_i$  is the mole fraction of MacroCTA(i);  $M_{n, \text{MacroCTA}(i)}$  is the number-average molecular weight of MacroCTA(i); Conv. is the fraction conversion of styrene in the second block polymerization;  $n_{\text{STY}}$  and  $n_{\text{MacroCTA}(i)}$  are the initial moles of styrene and MacroCTA, respectively; and  $M_{w, \text{STY}}$  is the molecular weight of styrene (i.e. 104.15).

**Table S5.** Kinetics of the RAFT-mediated emulsion polymerization of STY at 70 °C and 10 wt. % polymer fraction using the mixture (0.5:0.5 wt.) of MacroCTA-A and MacroCTA-B as MacroCTAs, AIBN as an initiator and SDS as a surfactant. **Method II – fast heating.**

| Repeat | Time, min | Conversion, % <sup>a</sup> | $M_n$ (theory) <sup>b</sup> | STY units (NMR) <sup>c</sup> | $M_n$ (NMR) <sup>c</sup> | SEC (THF) <sup>d</sup> |           | DLS <sup>e</sup> |           |
|--------|-----------|----------------------------|-----------------------------|------------------------------|--------------------------|------------------------|-----------|------------------|-----------|
|        |           |                            |                             |                              |                          | $M_n$                  | $\bar{D}$ | $D_h$            | $\bar{D}$ |
| i      | 15        | 6                          | 7014                        | 4                            | 7081                     | 4245                   | 1.10      | 201              | 0.091     |
|        | 45        | 20                         | 7831                        | 11                           | 7810                     | 5272                   | 1.13      | 184              | 0.223     |
|        | 90        | 61                         | 10222                       | 34                           | 10205                    | 9760                   | 1.58      | 206              | 0.150     |
|        | 130       | 73                         | 10922                       | 42                           | 11039                    | 10508                  | 1.52      | 203              | 0.213     |
|        | 170       | 81                         | 11388                       | 48                           | 11663                    | 10640                  | 1.51      | 215              | 0.175     |
|        | 210       | 86                         | 11680                       | 49                           | 11767                    | 10696                  | 1.51      | 201              | 0.193     |
|        | 240       | 86                         | 11680                       | 49                           | 11767                    | 10790                  | 1.51      | 216              | 0.262     |
| ii     | 15        | 5                          | 6956                        | 3                            | 6976                     | 4272                   | 1.10      | 236              | 0.210     |
|        | 45        | 21                         | 7889                        | 12                           | 7914                     | 5435                   | 1.13      | 233              | 0.252     |
|        | 90        | 55                         | 9872                        | 31                           | 9892                     | 8532                   | 1.34      | 293              | 0.172     |
|        | 130       | 66                         | 10514                       | 38                           | 10622                    | 9521                   | 1.27      | 307              | 0.253     |
|        | 170       | 76                         | 11097                       | 43                           | 11142                    | 9951                   | 1.27      | 315              | 0.160     |
|        | 210       | 86                         | 11680                       | 49                           | 11767                    | 10111                  | 1.27      | 302              | 0.136     |
|        | 240       | 86                         | 11680                       | 49                           | 11767                    | 10116                  | 1.28      | 289              | 0.176     |
| iii    | 15        | 4                          | 6897                        | 2                            | 6873                     | 4272                   | 1.10      | 165              | 0.282     |
|        | 45        | 22                         | 7947                        | 12                           | 7914                     | 5424                   | 1.14      | 204              | 0.397     |
|        | 90        | 58                         | 10047                       | 33                           | 10101                    | 8654                   | 1.31      | 292              | 0.177     |
|        | 130       | 68                         | 10630                       | 38                           | 10622                    | 9605                   | 1.28      | 303              | 0.213     |
|        | 170       | 76                         | 11097                       | 43                           | 11142                    | 9882                   | 1.28      | 308              | 0.143     |
|        | 210       | 84                         | 11563                       | 48                           | 11663                    | 10142                  | 1.27      | 311              | 0.235     |
|        | 240       | 84                         | 11563                       | 48                           | 11663                    | 10250                  | 1.29      | 287              | 0.208     |

<sup>a</sup>Conversions were obtained by gravimetric method. <sup>b</sup>Theoretical molecular weights were calculated based on the monomer conversions and using Equation S1 below. <sup>c</sup>Molecular weights ( $M_n$ (NMR)) were obtained from <sup>1</sup>H NMR. <sup>d</sup>THF as eluent with polystyrene as calibration standard. <sup>e</sup>Particle size ( $D_h$ ) and the polydispersity index ( $\bar{D}$ ) of latex were measured by DLS at 70 °C.

$$M_n(\text{theory}) = \sum_i x_i (M_{n, \text{MacroCTA}(i)} + \frac{n_{\text{STY}} \times M_{w, \text{STY}} \times \text{Conv.}}{\sum_j n_{\text{MacroCTA}(j)}})$$

(Equation S1)

where  $x_i$  is the mole fraction of MacroCTA(i);  $M_{n, \text{MacroCTA}(i)}$  is the number-average molecular weight of MacroCTA(i); Conv. is the fraction conversion of styrene in the second block polymerization;  $n_{\text{STY}}$  and  $n_{\text{MacroCTA}(i)}$  are the initial moles of styrene and MacroCTA, respectively; and  $M_{w, \text{STY}}$  is the molecular weight of styrene (i.e. 104.15).

**Table S6.** Kinetics of the RAFT-mediated emulsion polymerization of STY at 70 °C and 10 wt. % polymer fraction using the mixture (0.5:0.5 wt.) of MacroCTA-A and MacroCTA-B as MacroCTAs, AIBN as an initiator and SDS as a surfactant. **Method II – slow heating.**

| Repeat | Time, min | Conversion, % <sup>a</sup> | $M_n$ (theory) <sup>b</sup> | STY units (NMR) <sup>c</sup> | $M_n$ (NMR) <sup>c</sup> | SEC (THF) <sup>d</sup> |           | DLS <sup>e</sup> |           |
|--------|-----------|----------------------------|-----------------------------|------------------------------|--------------------------|------------------------|-----------|------------------|-----------|
|        |           |                            |                             |                              |                          | $M_n$                  | $\bar{D}$ | $D_h$            | $\bar{D}$ |
| i      | 15        | 2                          | 6627                        | 1                            | 6614                     | 4130                   | 1.11      | 173              | 0.081     |
|        | 45        | 11                         | 7151                        | 7                            | 7239                     | 4841                   | 1.13      | 135              | 0.225     |
|        | 90        | 56                         | 9776                        | 33                           | 9947                     | 9202                   | 1.75      | 153              | 0.191     |
|        | 130       | 68                         | 10476                       | 38                           | 10468                    | 10385                  | 1.69      | 159              | 0.196     |
|        | 170       | 78                         | 11059                       | 47                           | 11405                    | 10694                  | 1.65      | 145              | 0.217     |
|        | 210       | 78                         | 11059                       | 47                           | 11405                    | 10745                  | 1.71      | 158              | 0.198     |
|        | 240       | 78                         | 11059                       | 47                           | 11405                    | 10798                  | 1.66      | 169              | 0.181     |
| ii     | 15        | 0.2                        | 6522                        | 0                            | 6510                     | 4122                   | 1.11      | 174              | 0.083     |
|        | 45        | 3                          | 6685                        | 3                            | 6822                     | 4644                   | 1.13      | 130              | 0.169     |
|        | 90        | 62                         | 10126                       | 34                           | 10051                    | 9132                   | 1.87      | 147              | 0.189     |
|        | 130       | 79                         | 11117                       | 45                           | 11197                    | 10585                  | 1.84      | 127              | 0.276     |
|        | 170       | 82                         | 11292                       | 46                           | 11301                    | 11150                  | 1.79      | 130              | 0.206     |
|        | 210       | 82                         | 11292                       | 46                           | 11301                    | 11204                  | 1.76      | 138              | 0.241     |
|        | 240       | 82                         | 11292                       | 46                           | 11301                    | 11304                  | 1.76      | 155              | 0.181     |
| iii    | 15        | 2                          | 6627                        | 1                            | 6614                     | 4138                   | 1.11      | 188              | 0.037     |
|        | 45        | 5                          | 6801                        | 3                            | 6822                     | 4553                   | 1.11      | 132              | 0.2       |
|        | 90        | 56                         | 9776                        | 33                           | 9947                     | 7548                   | 1.68      | 133              | 0.185     |
|        | 130       | 65                         | 10301                       | 37                           | 10363                    | 9628                   | 1.58      | 136              | 0.198     |
|        | 170       | 70                         | 10593                       | 39                           | 10572                    | 10139                  | 1.53      | 140              | 0.194     |
|        | 210       | 74                         | 10826                       | 42                           | 10884                    | 10322                  | 1.54      | 123              | 0.279     |
|        | 240       | 75                         | 10884                       | 42                           | 10884                    | 10553                  | 1.55      | 132              | 0.208     |

<sup>a</sup>Conversions were obtained by gravimetric method. <sup>b</sup>Theoretical molecular weights were calculated based on the monomer conversions and using Equation S1 below. <sup>c</sup>Molecular weights ( $M_n$  (NMR)) were obtained from <sup>1</sup>H NMR. <sup>d</sup>THF as eluent with polystyrene as calibration standard. <sup>e</sup>Particle size ( $D_h$ ) and the polydispersity index ( $\bar{D}$ ) of latex were measured by DLS at 70 °C.

$$M_n(\text{theory}) = \sum_i x_i (M_{n, \text{MacroCTA}(i)} + \frac{n_{\text{STY}} \times M_{w, \text{STY}} \times \text{Conv.}}{\sum_j n_{\text{MacroCTA}(j)}})$$

(Equation S1)

where  $x_i$  is the mole fraction of MacroCTA(i);  $M_{n, \text{MacroCTA}(i)}$  is the number-average molecular weight of MacroCTA(i); Conv. is the fraction conversion of styrene in the second block polymerization;  $n_{\text{STY}}$  and  $n_{\text{MacroCTA}(i)}$  are the initial moles of styrene and MacroCTA, respectively; and  $M_{w, \text{STY}}$  is the molecular weight of styrene (i.e. 104.15).

**Table S7.** Molecular weight determined by SEC Triple Detection (DMAc + 0.03 % LiCl as eluent with polystyrene as calibration standard).

| Method               | Repeat | Time,<br>min | $M_n$ (theory) | SEC (Triple Detection) |           |
|----------------------|--------|--------------|----------------|------------------------|-----------|
|                      |        |              |                | $M_n$                  | $\bar{D}$ |
| I – fast<br>heating  | ii     | 15           | 6627           | 6463                   | 1.04      |
|                      |        | 45           | 6918           | 6945                   | 1.04      |
|                      |        | 90           | 9018           | 9312                   | 1.07      |
|                      |        | 130          | 10301          | 10316                  | 1.09      |
|                      |        | 170          | 10651          | 10465                  | 1.09      |
|                      |        | 210          | 10884          | 10793                  | 1.09      |
|                      |        | 240          | 10884          | 10904                  | 1.09      |
| I – slow<br>heating  | ii     | 15           | 6685           | 6569                   | 1.01      |
|                      |        | 45           | 7501           | 7471                   | 1.01      |
|                      |        | 90           | 9834           | 9786                   | 1.11      |
|                      |        | 130          | 10593          | 10652                  | 1.12      |
|                      |        | 170          | 11176          | 11203                  | 1.09      |
|                      |        | 210          | 11292          | 11397                  | 1.12      |
|                      |        | 240          | 11292          | 11450                  | 1.09      |
| II – fast<br>heating | ii     | 15           | 6956           | 6708                   | 1.01      |
|                      |        | 45           | 7889           | 7302                   | 1.01      |
|                      |        | 90           | 9872           | 9526                   | 1.14      |
|                      |        | 130          | 10514          | 10002                  | 1.13      |
|                      |        | 170          | 11097          | 10584                  | 1.15      |
|                      |        | 210          | 11680          | 11388                  | 1.12      |
|                      |        | 240          | 11680          | 11459                  | 1.13      |
| II – slow<br>heating | ii     | 15           | 6522           | 6293                   | 1.01      |
|                      |        | 45           | 6685           | 6602                   | 1.07      |
|                      |        | 90           | 10126          | 10186                  | 1.69      |
|                      |        | 130          | 11117          | 11019                  | 1.75      |
|                      |        | 170          | 11292          | 11210                  | 1.47      |
|                      |        | 210          | 11292          | 11425                  | 1.4       |
|                      |        | 240          | 11292          | 11540                  | 1.51      |

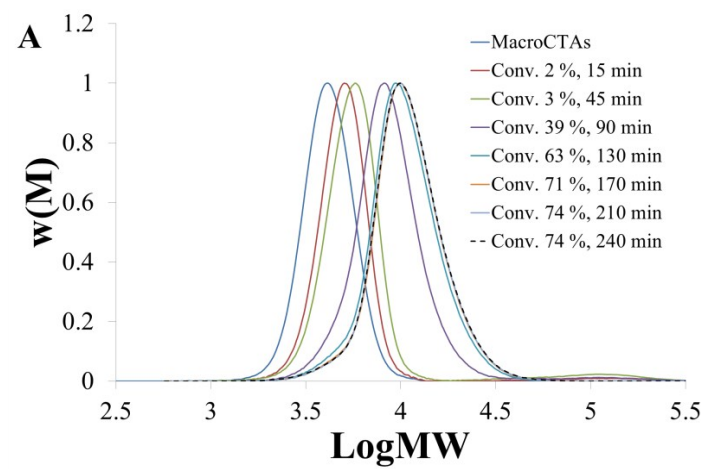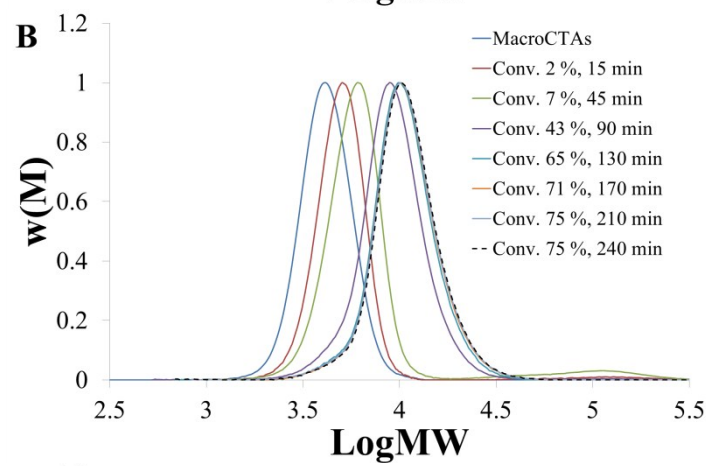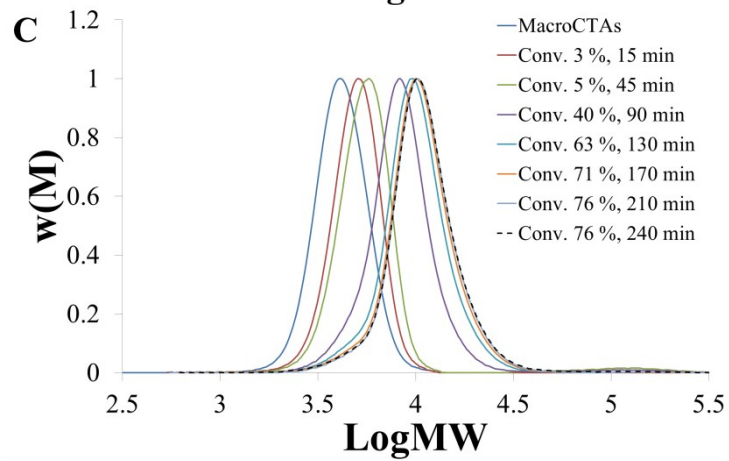

**Figure S5.** SEC traces evolution over time for the RAFT-mediated emulsion polymerization of STY at 70 °C and 10 wt. % polymer fraction by Method I – fast heating using the mixture (0.5:0.5 wt.) of MacroCTA-A and MacroCTA-B as MacroCTAs, AIBN as an initiator and SDS as a surfactant. THF as eluent with polystyrene as calibration standard. The polymerization was reproduced three times. (A) Repeat i; (B) Repeat ii; (C) Repeat iii.

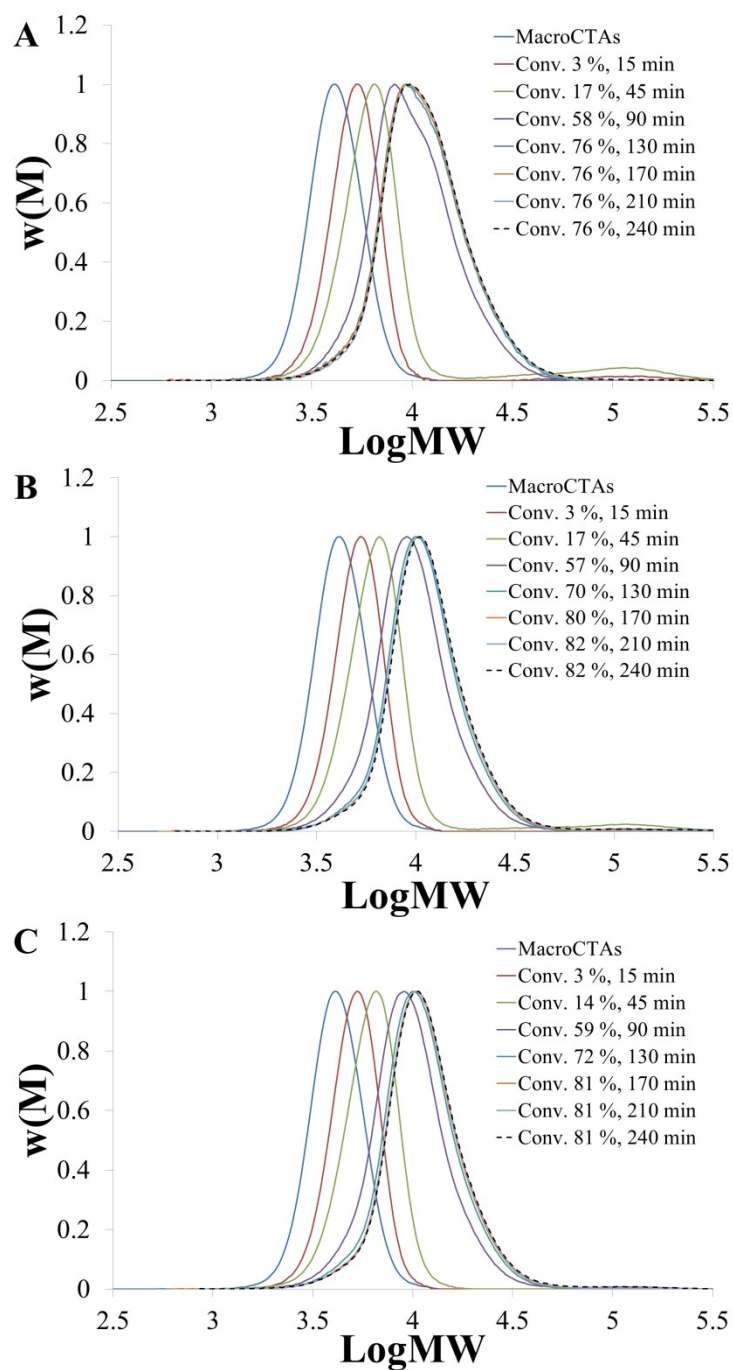

**Figure S6.** SEC traces evolution over time for the RAFT-mediated emulsion polymerization



of STY at 70 °C and 10 wt. % polymer fraction by Method I – slow heating using the mixture (0.5:0.5 wt.) of MacroCTA-A and MacroCTA-B as MacroCTAs, AIBN as an initiator and SDS as a surfactant. THF as eluent with polystyrene as calibration standard. The polymerization was reproduced three times. (A) Repeat i; (B) Repeat ii; (C) Repeat iii.

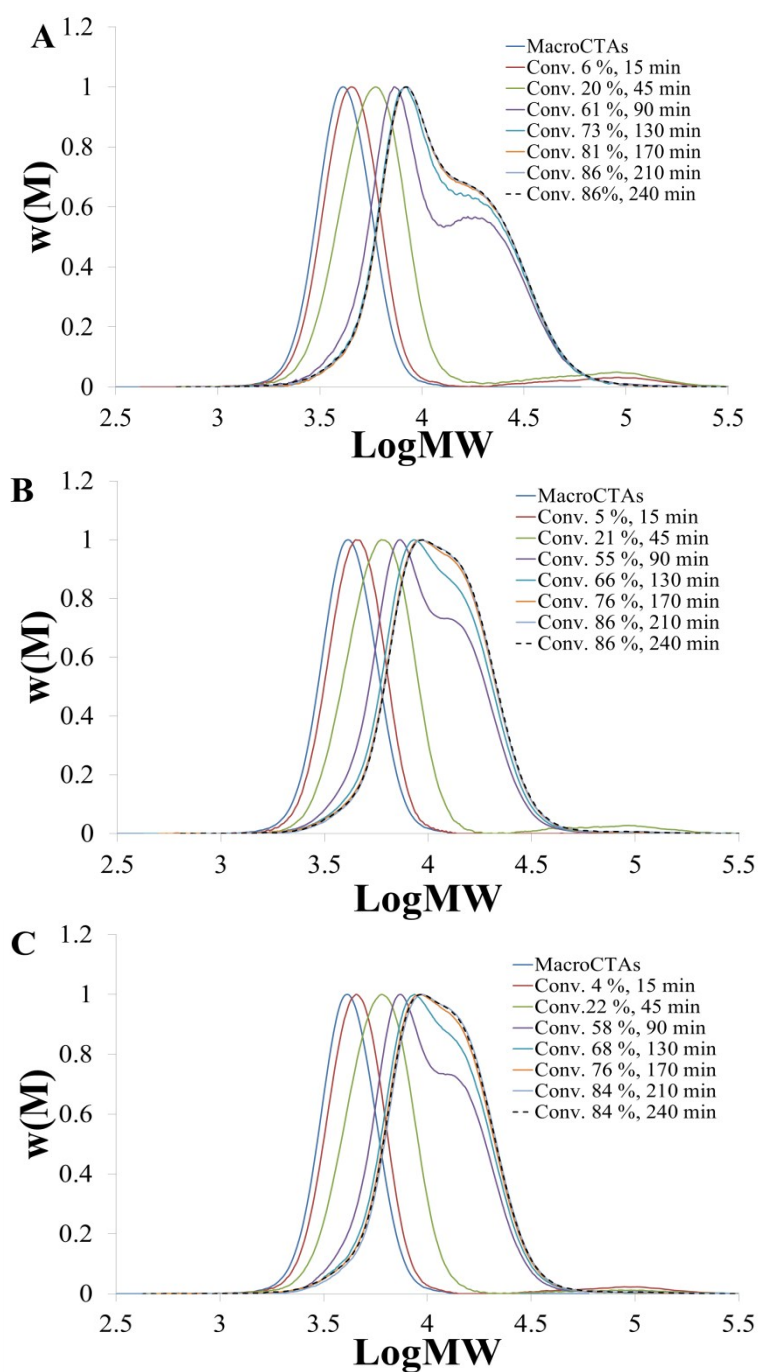

**Figure S7.** SEC traces evolution over time for the RAFT-mediated emulsion polymerization of STY at 70 °C and 10 wt. % polymer fraction by Method II – fast heating using the

mixture (0.5:0.5 wt.) of MacroCTA-A and MacroCTA-B as MacroCTAs, AIBN as an initiator and SDS as a surfactant. THF as eluent with polystyrene as calibration standard. The polymerization was reproduced three times. (A) Repeat i; (B) Repeat ii; (C) Repeat iii.

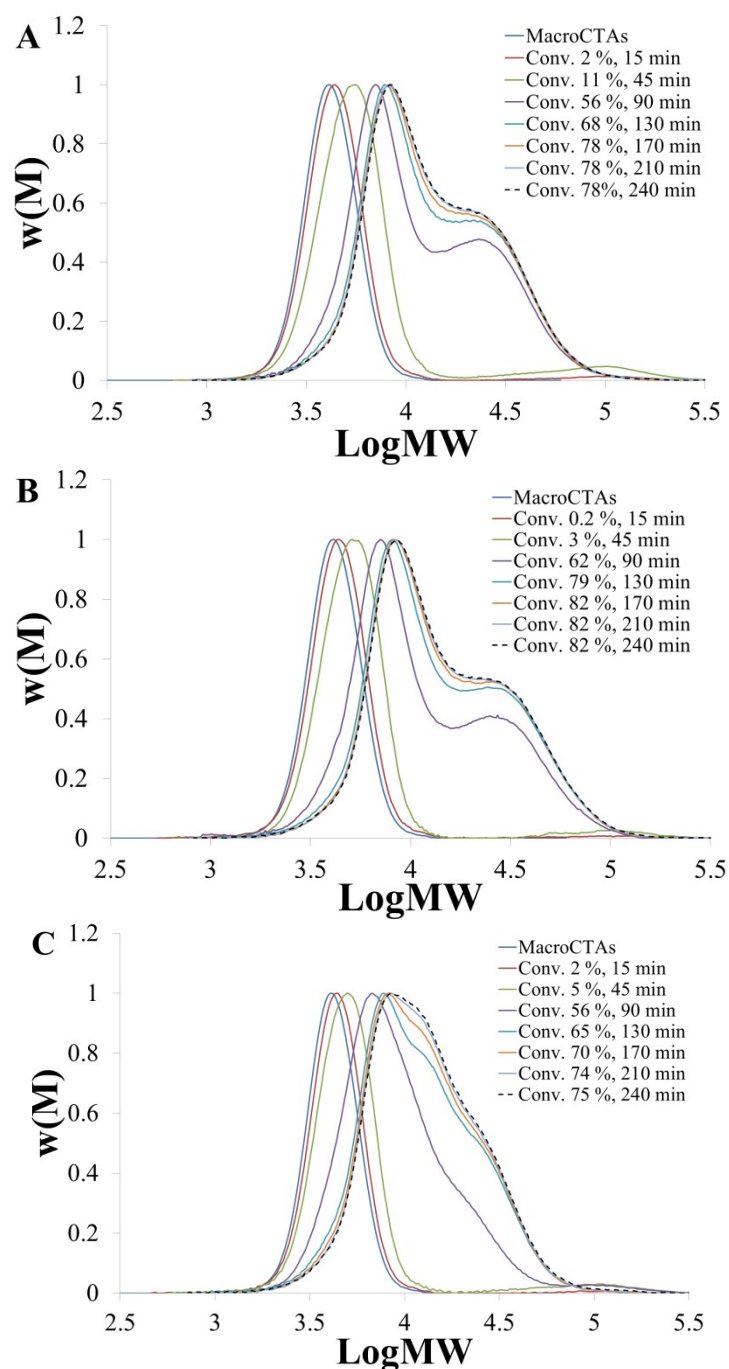

**Figure S8.** SEC traces evolution over time for the RAFT-mediated emulsion polymerization of STY at 70 °C and 10 wt. % polymer fraction by Method II – slow heating using the mixture (0.5:0.5 wt.) of MacroCTA-A and MacroCTA-B as MacroCTAs, AIBN as an

initiator and SDS as a surfactant. THF as eluent with polystyrene as calibration standard. The polymerization was reproduced three times. (A) Repeat i; (B) Repeat ii; (C) Repeat iii.

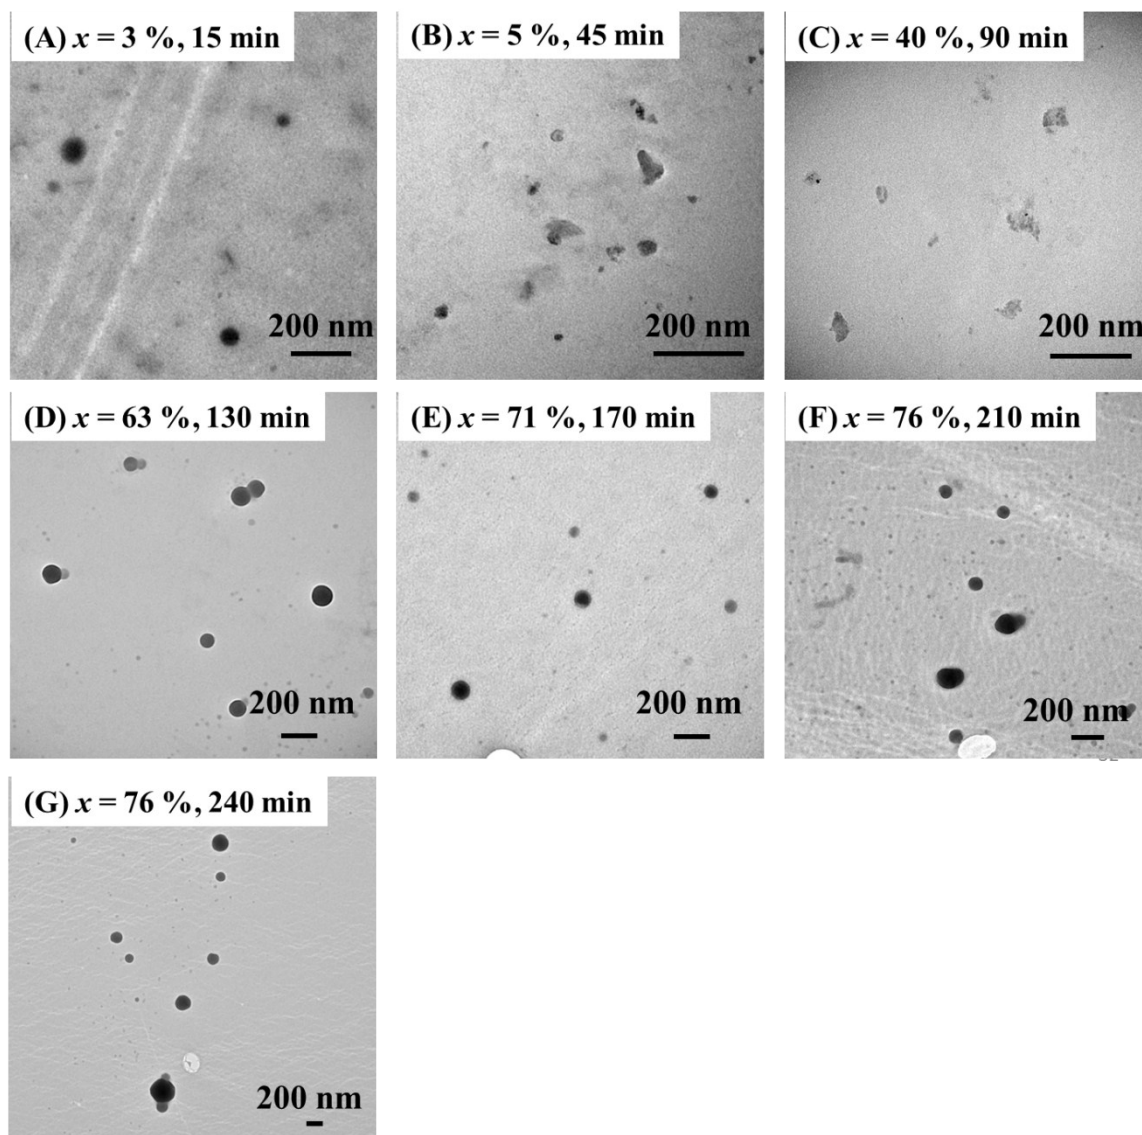

**Figure S9.** TEM images of latex spheres at 70 °C produced by Method I – fast heating at different conversion of STY during the RAFT-mediated emulsion polymerization of STY at 70 °C and 10 wt. % polymer fraction using the mixture (0.5:0.5 wt.) of MacroCTA-A and MacroCTA-B as MacroCTAs, AIBN as an initiator and SDS as a surfactant.  $x$  – conversion of styrene calculated by gravimetric method.

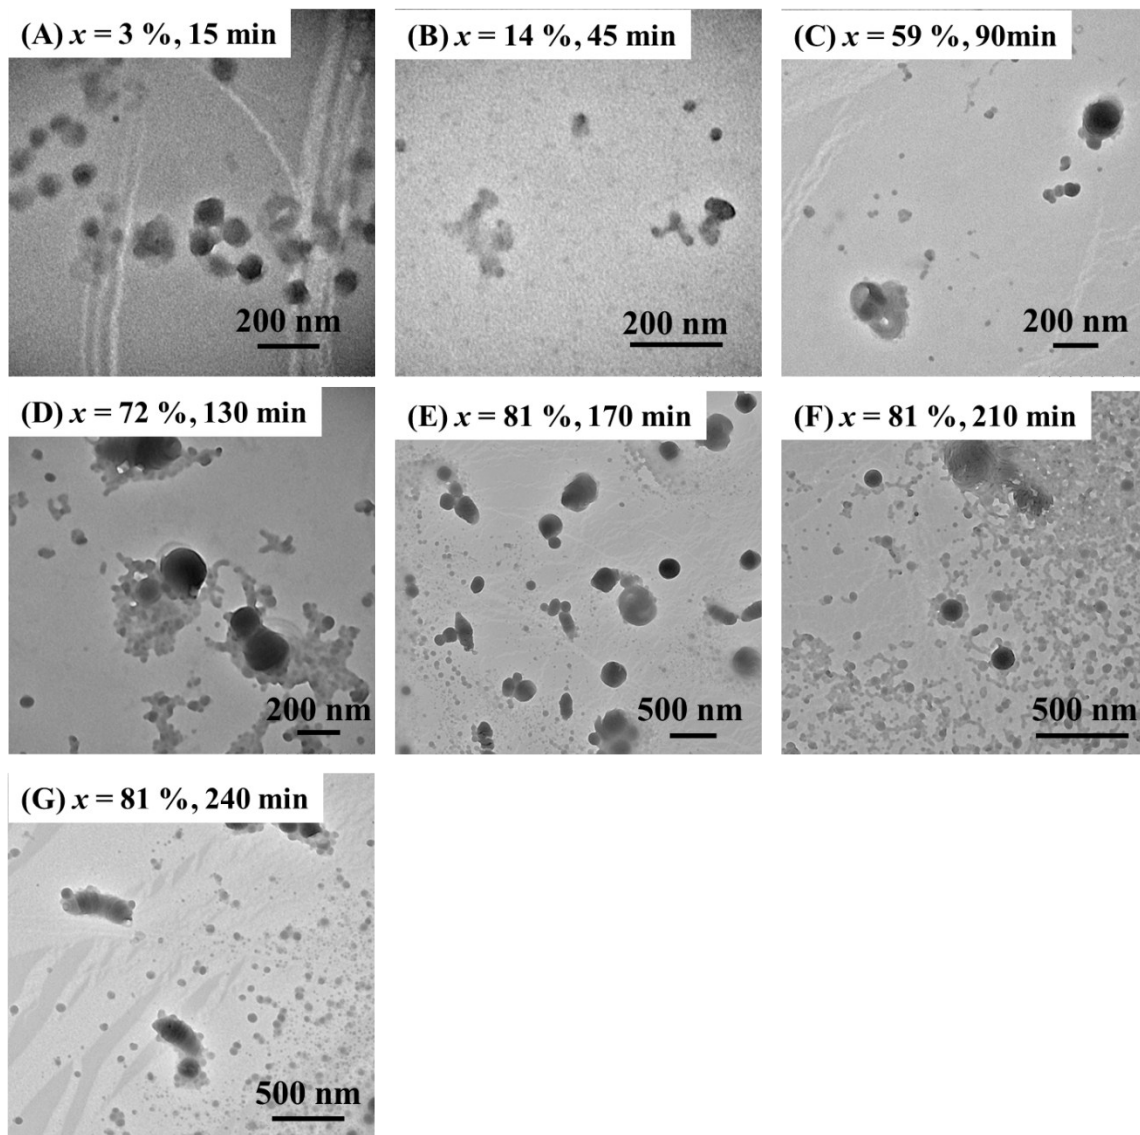

**Figure S10.** TEM images of latex spheres at 70 °C produced by Method I – slow heating at different conversion of STY during the RAFT-mediated emulsion polymerization of STY at 70 °C and 10 wt. % polymer fraction using the mixture (0.5:0.5 wt.) of MacroCTA-A and MacroCTA-B as MacroCTAs, AIBN as an initiator and SDS as a surfactant.  $x$  – conversion of styrene calculated by gravimetric method.

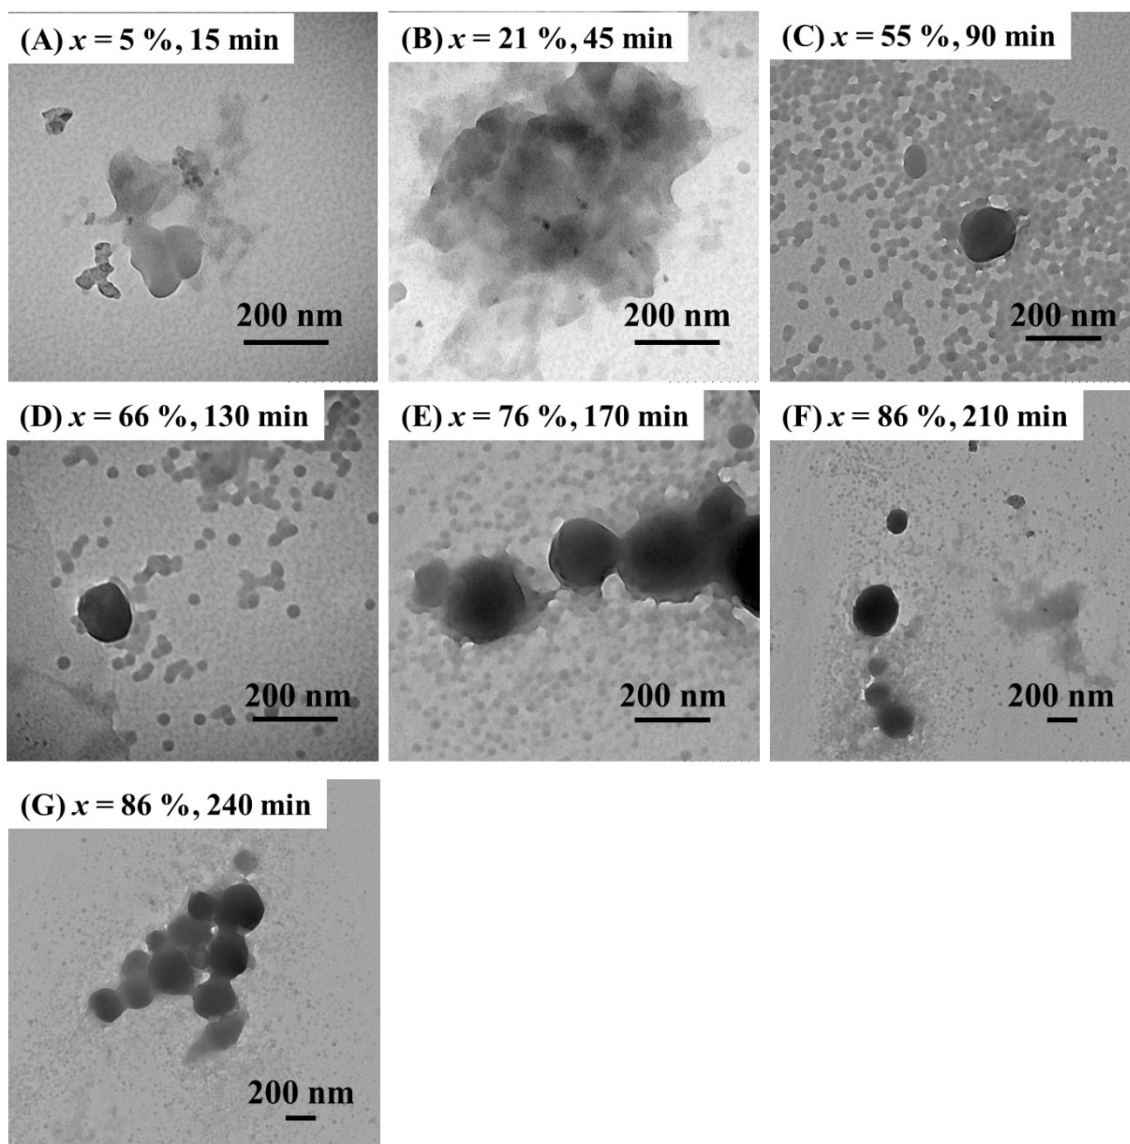

**Figure S11.** TEM images of latex spheres at 70 °C produced by Method II – fast heating at different conversion of STY during the RAFT-mediated emulsion polymerization of STY at 70 °C and 10 wt. % polymer fraction using the mixture (0.5:0.5 wt.) of MacroCTA-A and MacroCTA-B as MacroCTAs, AIBN as an initiator and SDS as a surfactant.  $x$  – conversion of styrene calculated by gravimetric method.

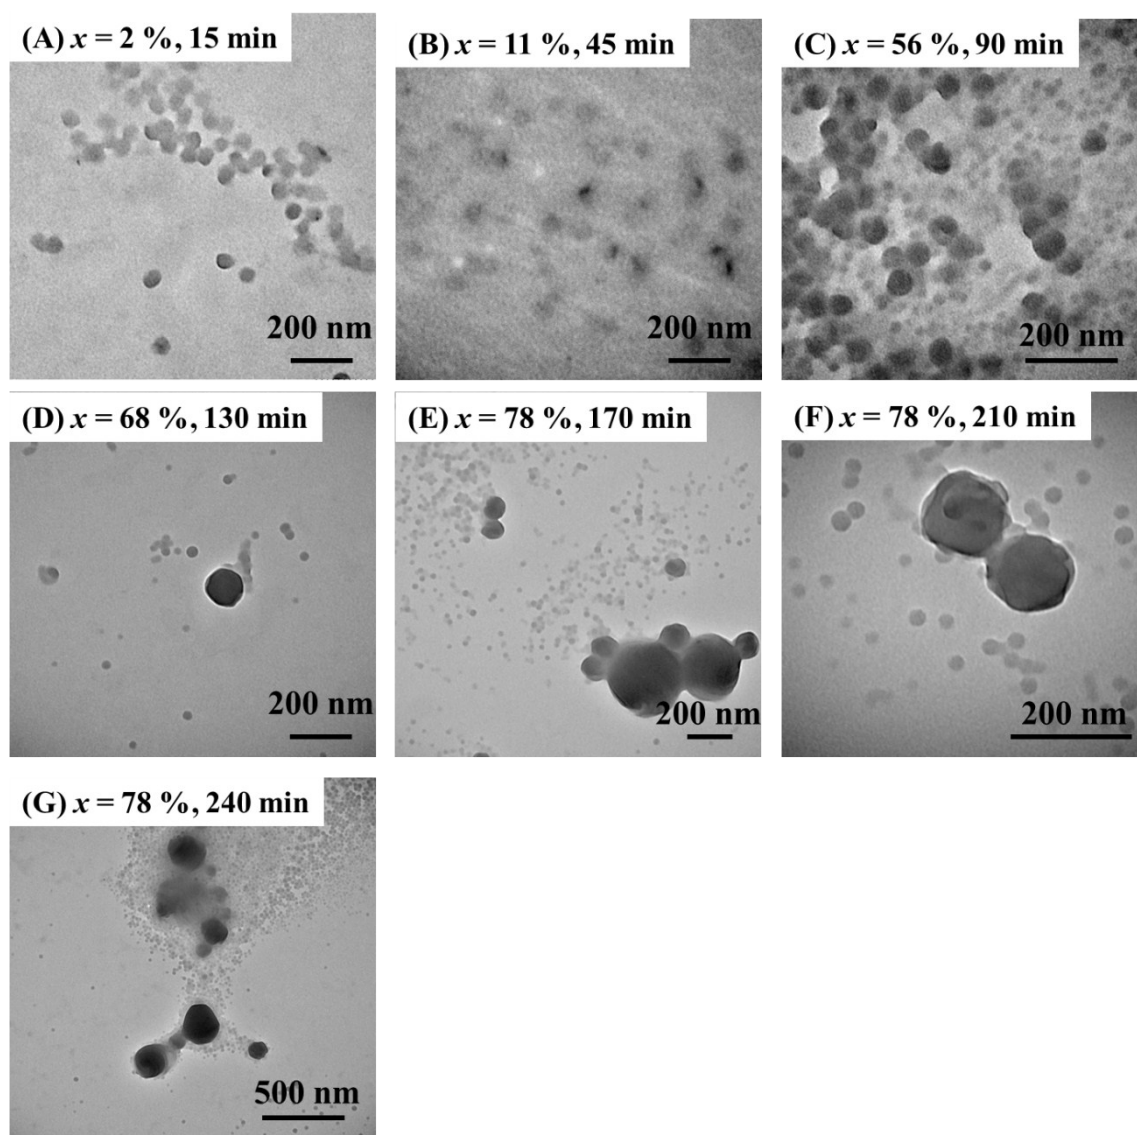

**Figure S12.** TEM images of latex spheres at 70 °C produced by Method II – slow heating at different conversion of STY during the RAFT-mediated emulsion polymerization of STY at 70 °C and 10 wt. % polymer fraction using the mixture (0.5:0.5 wt.) of MacroCTA-A and MacroCTA-B as MacroCTAs, AIBN as an initiator and SDS as a surfactant.  $x$  – conversion of styrene calculated by gravimetric method.

**Table S8.** The RAFT-mediated emulsion polymerization of STY at 70 °C and 10 wt. % polymer fraction using the mixture (0.5:0.5 wt.) of MacroCTA-A and MacroCTA-B as MacroCTAs, AIBN as an initiator and SDS as a surfactant. The samples for conversion, SEC and DLS were taken at the end of polymerization (240 min).

| Method               | Repeat | Conversion,<br>% <sup>a</sup> | $M_n$<br>(theory) <sup>b</sup> | SEC (THF) <sup>c</sup> |           | SEC (Triple Detection) <sup>d</sup> |           | DLS <sup>e</sup> |           |
|----------------------|--------|-------------------------------|--------------------------------|------------------------|-----------|-------------------------------------|-----------|------------------|-----------|
|                      |        |                               |                                | $M_n$                  | $\bar{D}$ | $M_n$                               | $\bar{D}$ | $D_h$            | $\bar{D}$ |
| I – fast<br>heating  | i      | 72                            | 10709                          | 9996                   | 1.25      | 10851                               | 1.05      | 99               | 0.094     |
|                      | ii     | 70                            | 10592                          | 9791                   | 1.21      | 10543                               | 1.07      | 101              | 0.099     |
|                      | iii    | 73                            | 10767                          | 9558                   | 1.21      | 10965                               | 1.03      | 98               | 0.095     |
| I – slow<br>heating  | i      | 75                            | 11039                          | 10128                  | 1.30      | 11357                               | 1.08      | 168              | 0.136     |
|                      | ii     | 72                            | 10864                          | 10082                  | 1.24      | 11468                               | 1.06      | 153              | 0.223     |
|                      | iii    | 76                            | 11097                          | 9988                   | 1.25      | 11429                               | 1.06      | 152              | 0.178     |
| II – fast<br>heating | i      | 81                            | 11388                          | 10060                  | 1.32      | 11109                               | 1.35      | 294              | 0.161     |
|                      | ii     | 87                            | 11738                          | 11081                  | 1.45      | 11210                               | 1.24      | 207              | 0.145     |
|                      | iii    | 86                            | 11680                          | 11048                  | 1.46      | 11359                               | 1.28      | 216              | 0.249     |
| II – slow<br>heating | i      | 79                            | 11272                          | 11236                  | 1.62      | 11674                               | 1.10      | 174              | 0.197     |
|                      | ii     | 80                            | 11330                          | 11818                  | 1.71      | 12986                               | 1.18      | 159              | 0.208     |
|                      | iii    | 75                            | 11039                          | 10894                  | 1.49      | 11553                               | 1.12      | 177              | 0.192     |

<sup>a</sup>Conversions were obtained by gravimetric method. <sup>b</sup>Theoretical molecular weights were calculated based on the monomer conversions and using Equation S1 below. <sup>c</sup>THF as eluent with polystyrene as calibration standard. <sup>d</sup>DMAc + 0.03 % LiCl as eluent with polystyrene as calibration standard. <sup>e</sup>Particle size ( $D_h$ ) and the polydispersity index ( $\bar{D}$ ) of latex were measured by DLS at 70 °C.

$$M_n(\text{theory}) = \sum_i x_i (M_{n, \text{MacroCTA}(i)} + \frac{n_{\text{STY}} \times M_{w, \text{STY}} \times \text{Conv.}}{\sum_j n_{\text{MacroCTA}(j)}})$$

(Equation S1)

where  $x_i$  is the mole fraction of MacroCTA(i);  $M_{n, \text{MacroCTA}(i)}$  is the number-average molecular weight of MacroCTA(i); Conv. is the fraction conversion of styrene in the second block polymerization;  $n_{\text{STY}}$  and  $n_{\text{MacroCTA}(i)}$  are the initial moles of styrene and MacroCTA, respectively; and  $M_{w, \text{STY}}$  is the molecular weight of styrene (i.e. 104.15).

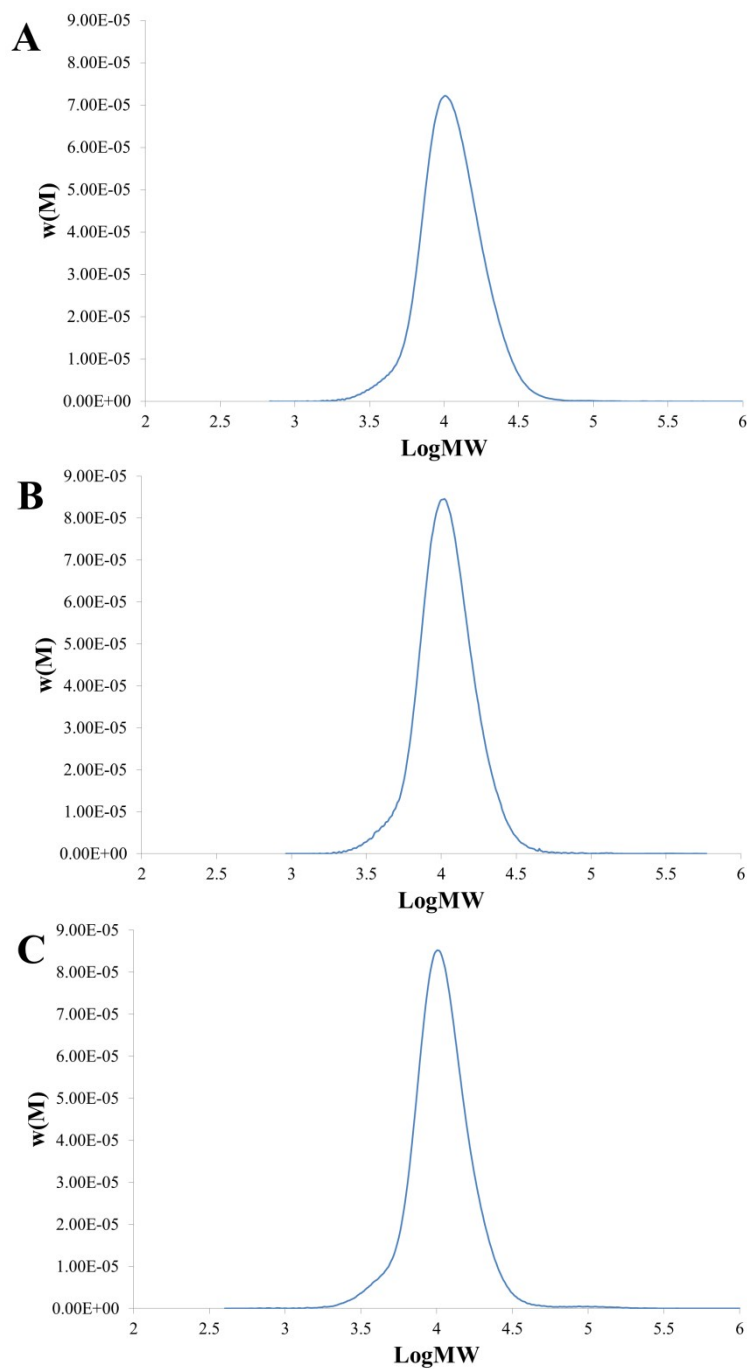

**Figure S13.** SEC traces for the RAFT-mediated emulsion polymerization of STY at 70 °C and 10 wt. % polymer fraction by method I using the mixture (0.5:0.5 wt.) of MacroCTA-A and MacroCTA-B as MacroCTAs, AIBN as an initiator and SDS as a surfactant. THF as eluent with polystyrene as calibration standard. The polymerization was reproduced three times. (A) Repeat i; (B) Repeat ii; (C) Repeat iii.



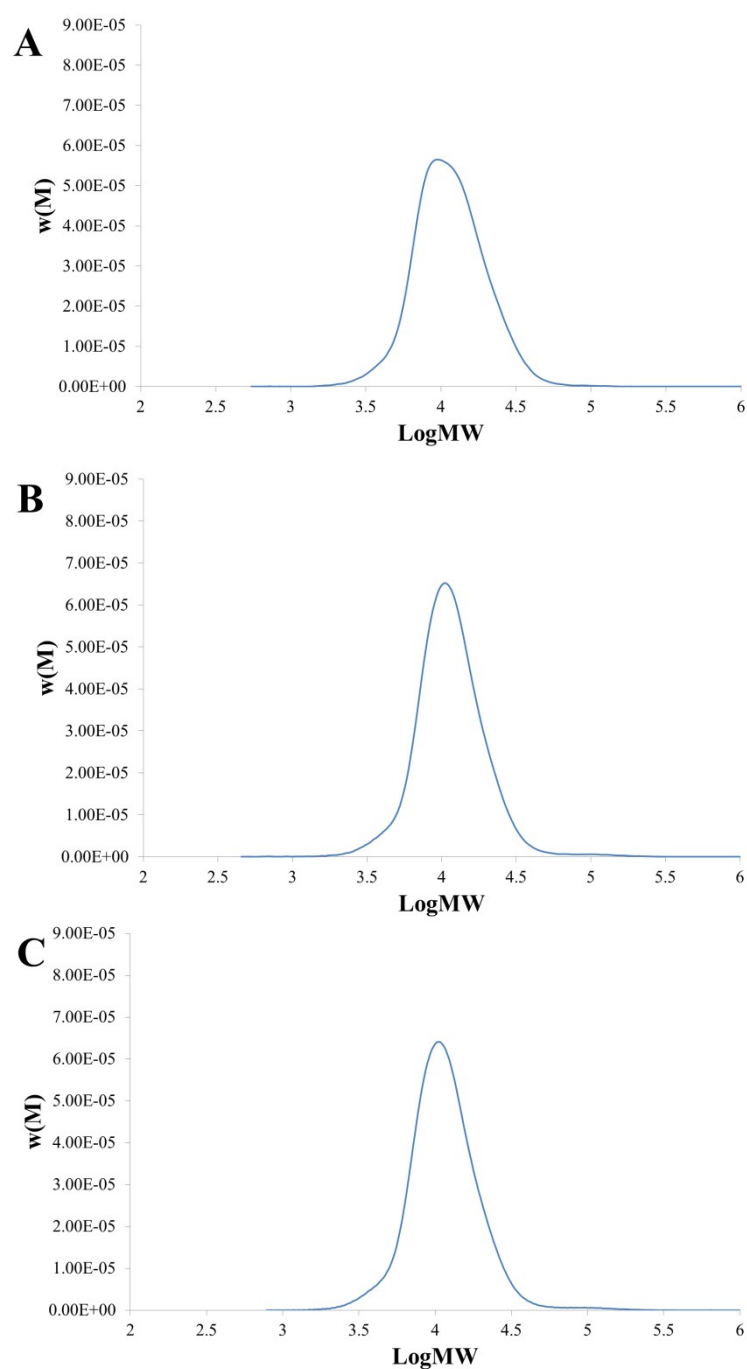

**Figure S14.** SEC traces for the RAFT-mediated emulsion polymerization of STY at 70 °C and 10 wt. % polymer fraction by method II using the mixture (0.5:0.5 wt.) of P(NIPAM<sub>44</sub>-co-STY<sub>1.5</sub>)-S(C=S)SC<sub>4</sub>H<sub>9</sub> and P(NIPAM<sub>47</sub>-co-DMA<sub>33</sub>)-S(C=S)SC<sub>4</sub>H<sub>9</sub> as MacroCTAs, AIBN as an initiator and SDS as a surfactant. THF as eluent with polystyrene as calibration standard. The polymerization was reproduced three times. (A) Repeat i; (B) Repeat ii; (C) Repeat iii.

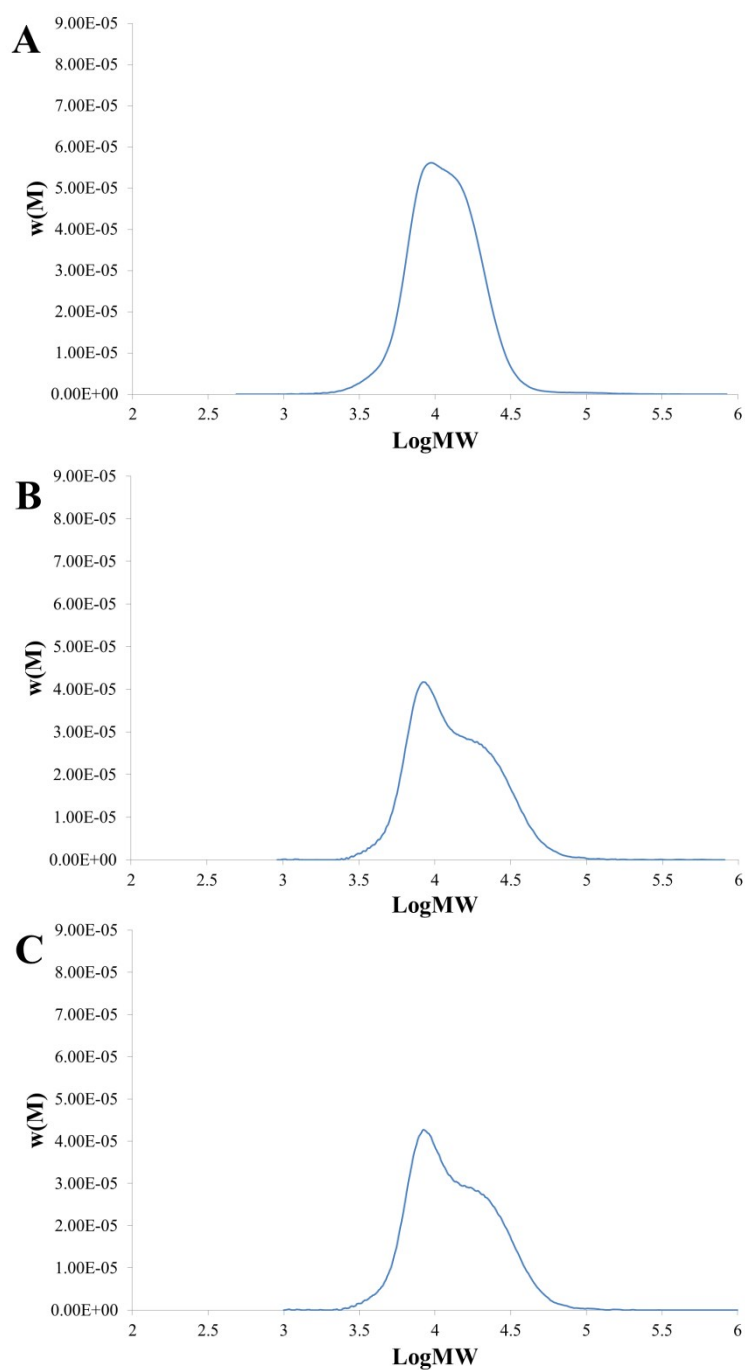

**Figure S15.** SEC traces for the RAFT-mediated emulsion polymerization of STY at 70 °C and 10 wt. % polymer fraction by method III using the mixture (0.5:0.5 wt.) of P(NIPAM<sub>44</sub>-co-STY<sub>1.5</sub>)-S(C=S)SC<sub>4</sub>H<sub>9</sub> and P(NIPAM<sub>47</sub>-co-DMA<sub>33</sub>)-S(C=S)SC<sub>4</sub>H<sub>9</sub> as MacroCTAs, AIBN as an initiator and SDS as a surfactant. THF as eluent with polystyrene as calibration standard. The polymerization was reproduced three times. (A) Repeat i; (B) Repeat ii; (C) Repeat iii.

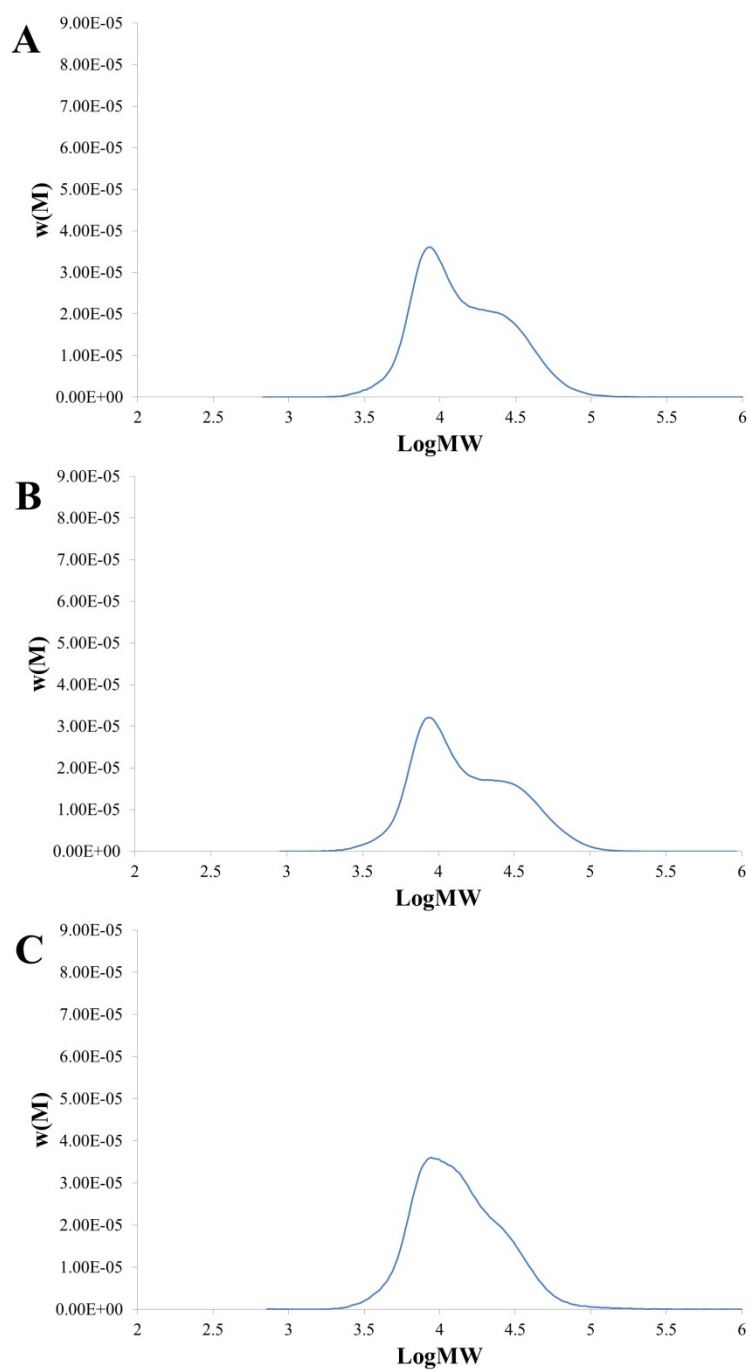

**Figure S16.** SEC traces for the RAFT-mediated emulsion polymerization of STY at 70 °C and 10 wt. % polymer fraction by method IV using the mixture (0.5:0.5 wt.) of P(NIPAM<sub>44</sub>-co-STY<sub>1.5</sub>)-S(C=S)SC<sub>4</sub>H<sub>9</sub> and P(NIPAM<sub>47</sub>-co-DMA<sub>33</sub>)-S(C=S)SC<sub>4</sub>H<sub>9</sub> as MacroCTAs, AIBN as an initiator and SDS as a surfactant. THF as eluent with polystyrene as calibration standard. The polymerization was reproduced three times. (A) Repeat i; (B) Repeat ii; (C) Repeat iii.

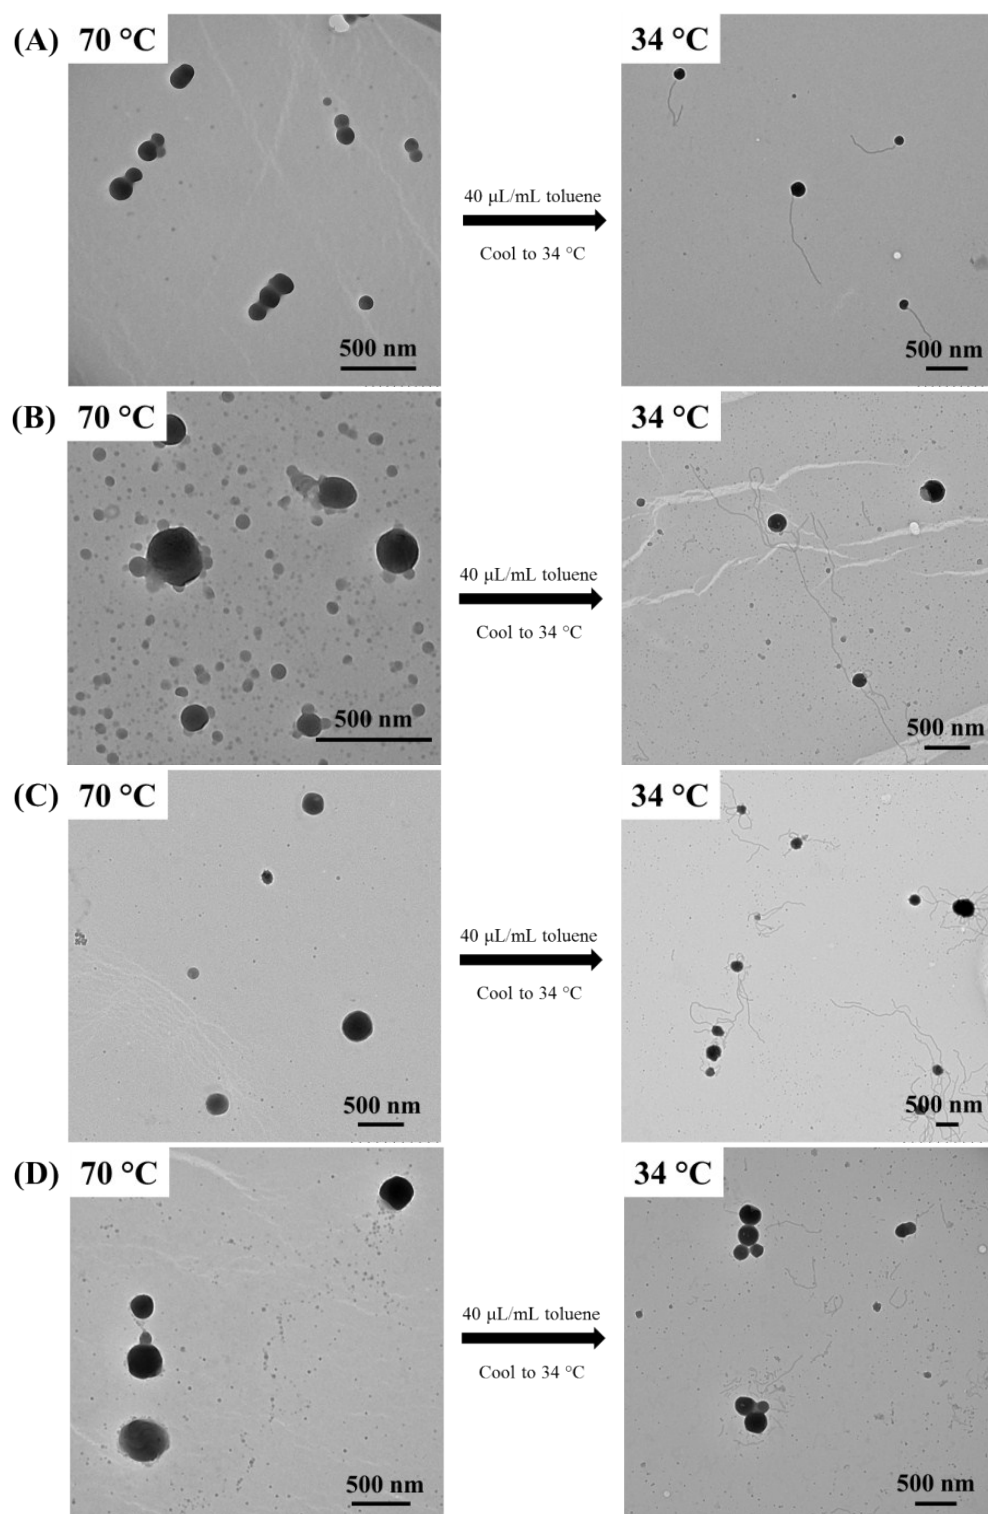

**Figure S17.** TEM images of TDMT transformation (add 40 μL/mL toluene and cool to 34 °C) of latex particles obtained from emulsion polymerizations (Table S8) by different methods. (A) Method I – fast heating; (B) Method I – slow heating; (C) Method II – fast heating; (D) Method II – slow heating.
